# Supplementary material
Source: Royal Society of Chemistry journal article supplement (doi:10.1039/d6nh00013d)
Supplement: d6nh00013d1.pdf [file d6nh00013d1.pdf]

## Supporting information

# Revealing the Potential of 2D WS<sub>2</sub> Memristors as an Artificial Synapse with Resilient Gradual Behavior at High Temperatures for Neuromorphic Applications

Tanya Chaudhary<sup>a</sup>, Davinder Kaur<sup>\*a</sup>

<sup>a</sup> Functional Nanomaterials Research Laboratory (FNRL), Department of Physics, and Centre of Nanotechnology Roorkee, Uttarakhand, India

\*Corresponding author: [davinder.kaur@ph.iitr.ac.in](mailto:davinder.kaur@ph.iitr.ac.in)

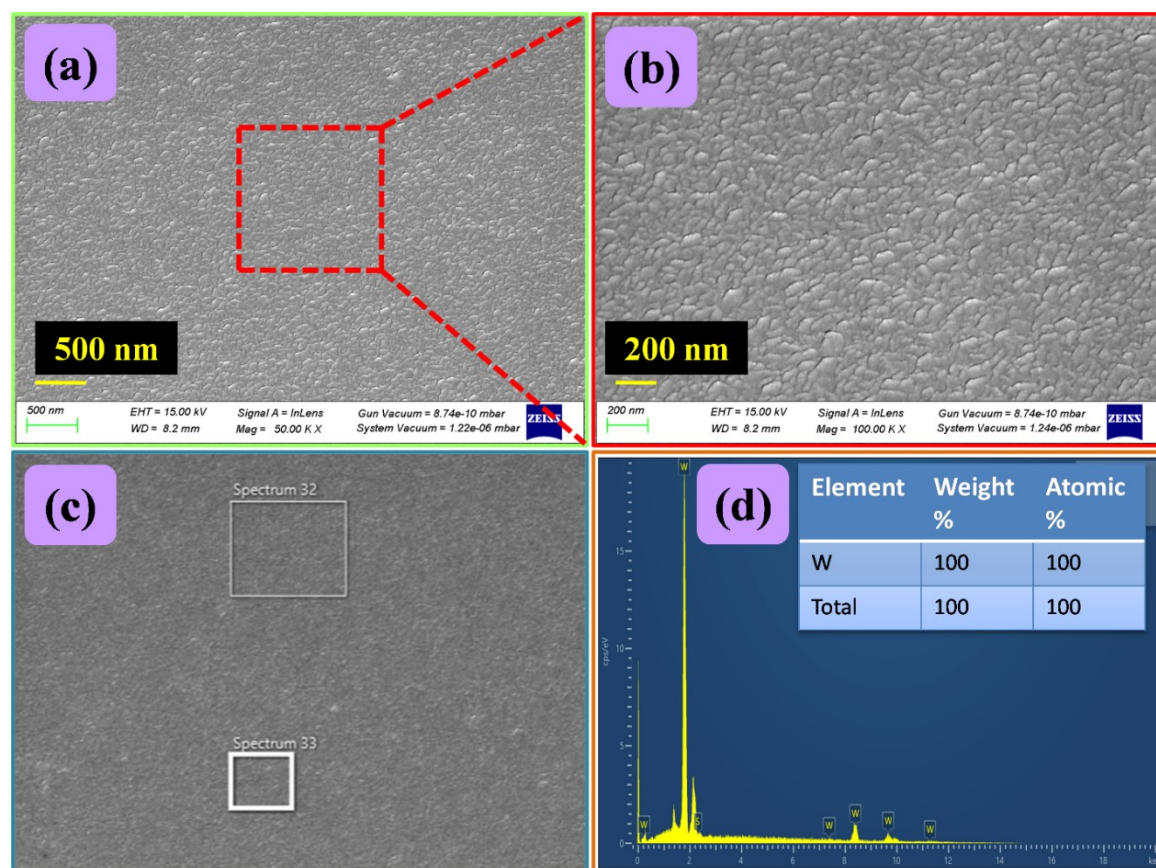

**Fig. S1.** Top-surface FESEM images of W at magnifications of (a) 50kx, (b) 100kx. (c) Elemental mapping of W. (d) EDS spectrum of W (inset shows elemental concentration).

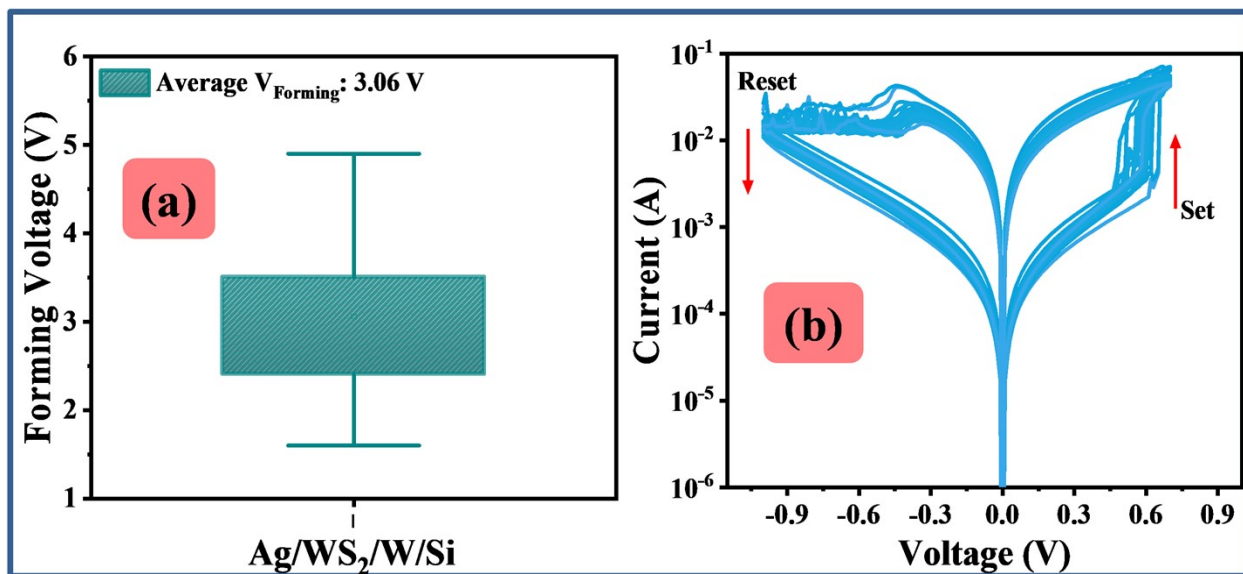

Fig. S2. (a) Statistical distribution of forming voltage of the Ag/WS<sub>2</sub>/W memristive device. (b) The 150-cycle I-V curve of the memristive device.

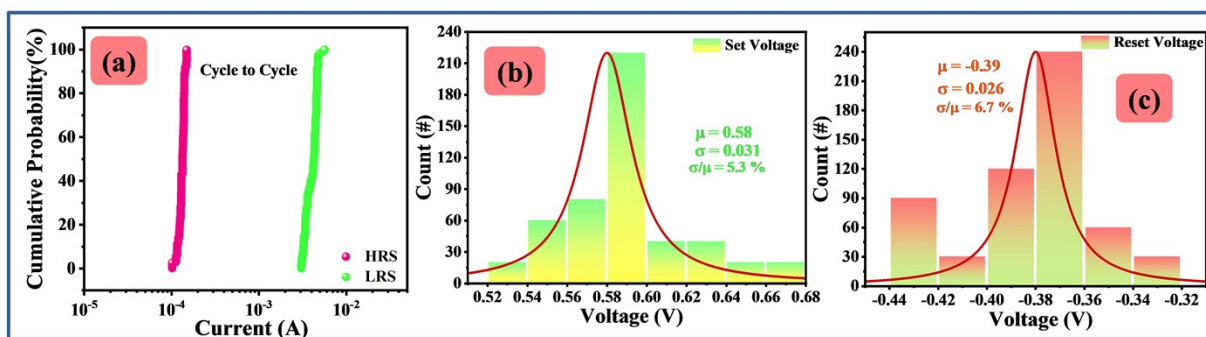

Fig. S3. (a) Cumulative distributions of the HRS and LRS. (b, c) Statistical distribution of set and reset voltages.

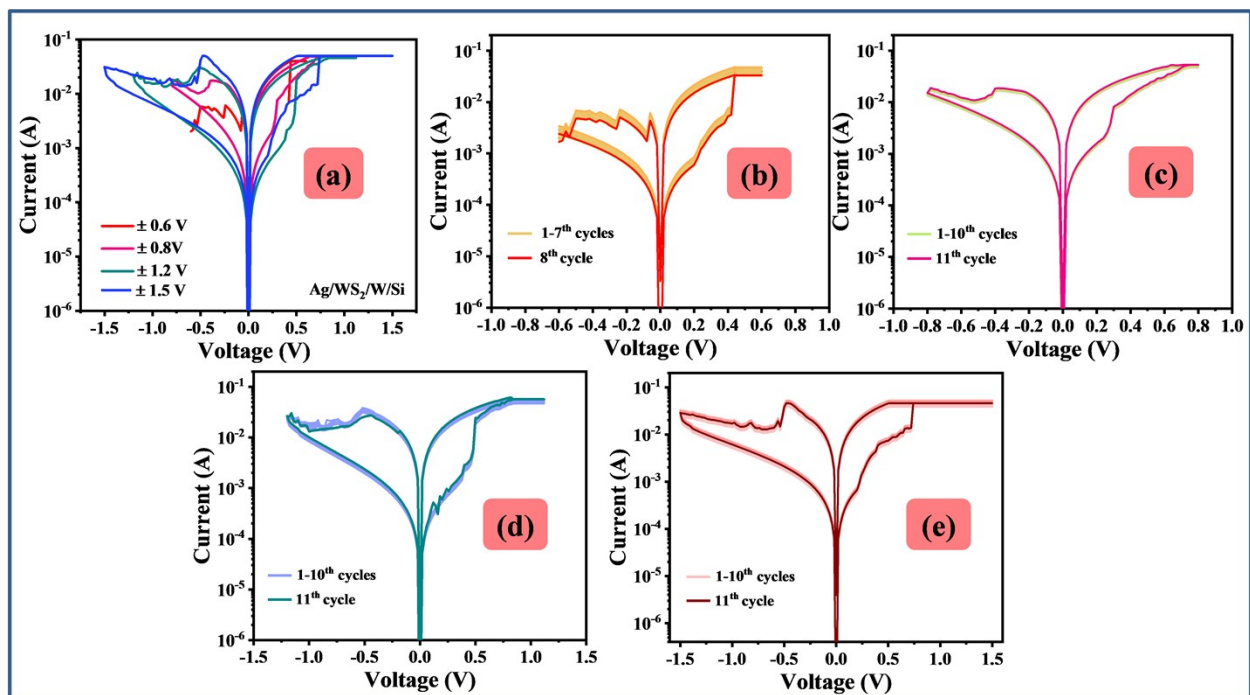

**Fig. S4.** (a) I-V curve of the memristor device, (b, e) Corresponding multiple IV cycles at different voltage ranges.

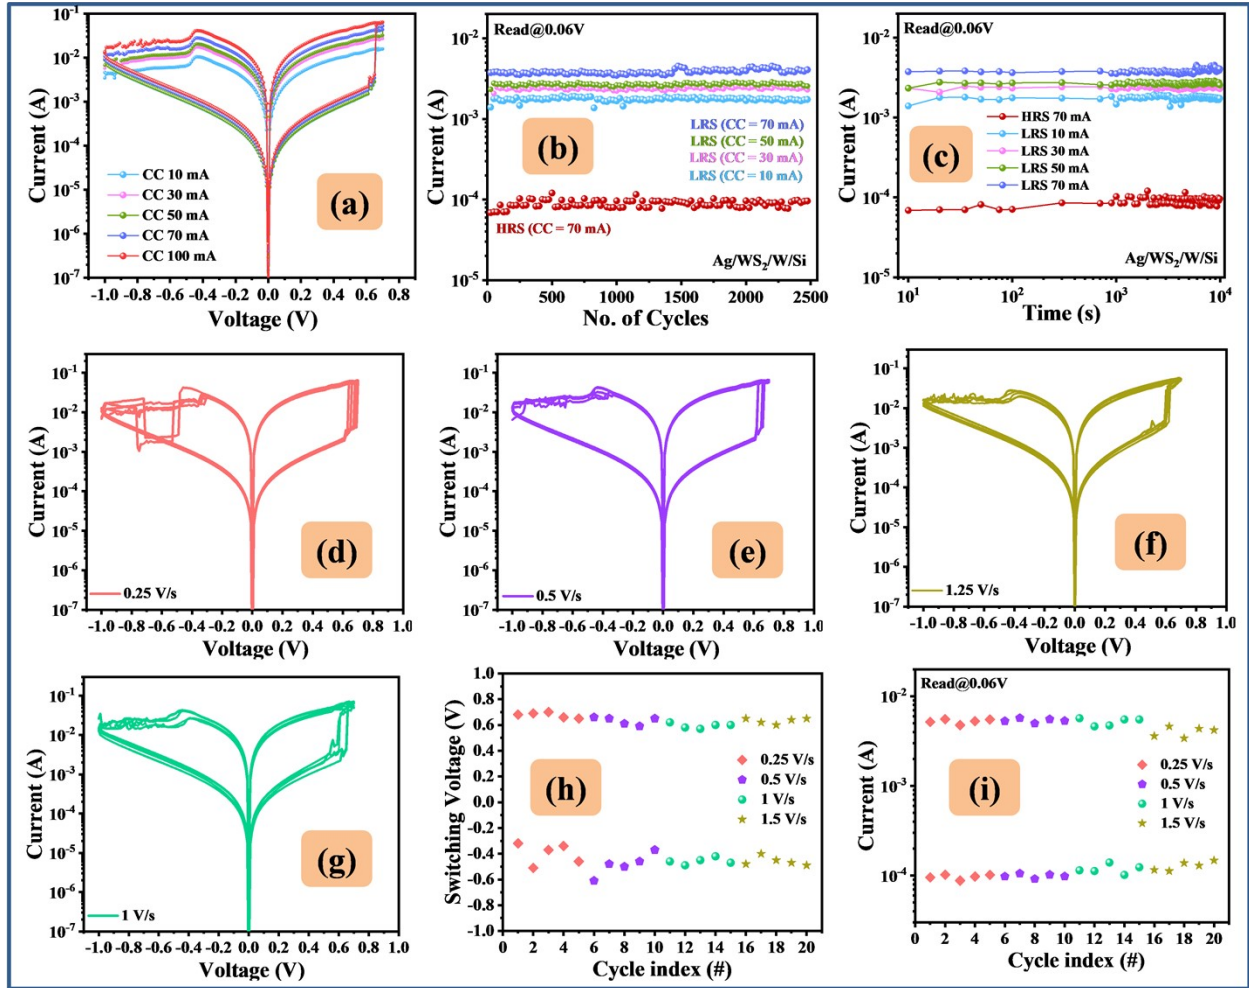

**Fig. S5.** Effect of compliance current (CC) and voltage scan speed. (a) I-V curve of the memristor device at different CC. (b, c) Endurance, retention at CC (70 mA, 50 mA, 30 mA, 10 mA), respectively. (d-f) I-V characteristics at different scan speeds. (h) The variation of switching voltages with scanning speed. (i) The change in HRS and LRS states.

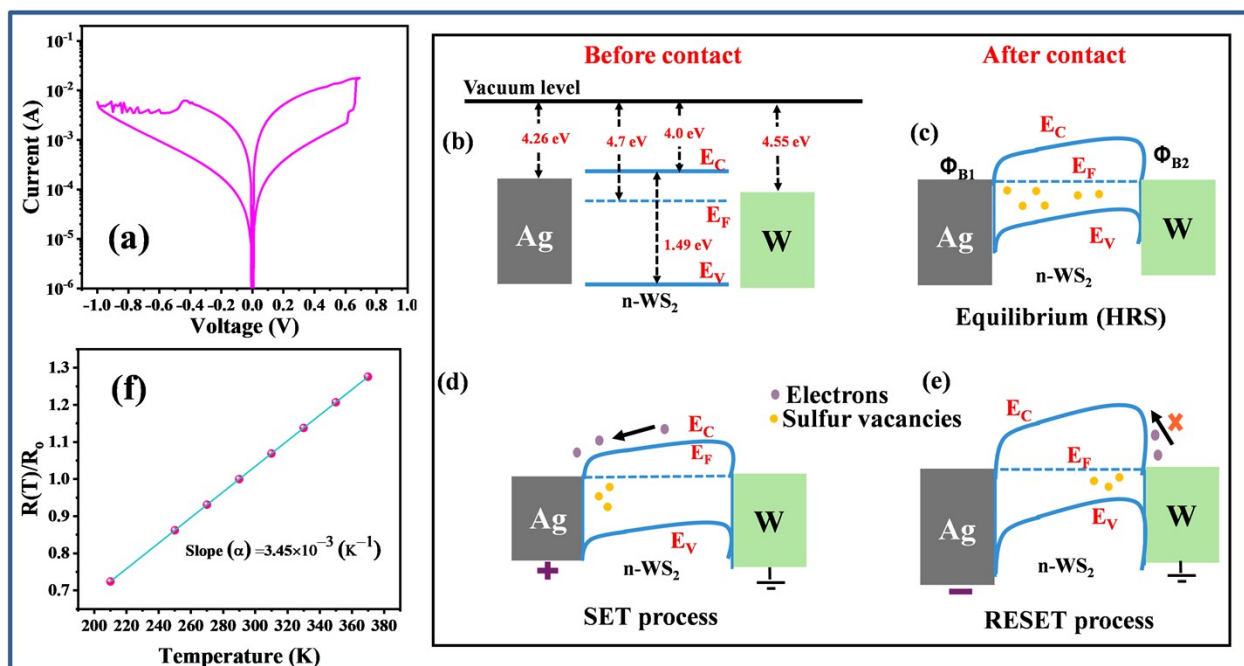

**Fig. S6.** (a) IV curve with tungsten as top electrode. Energy level band diagram (b) Before contact, (b) after contact (no biasing), (c) SET process, (d) RESET process. (f) Temperature-dependent coefficient of Ag.

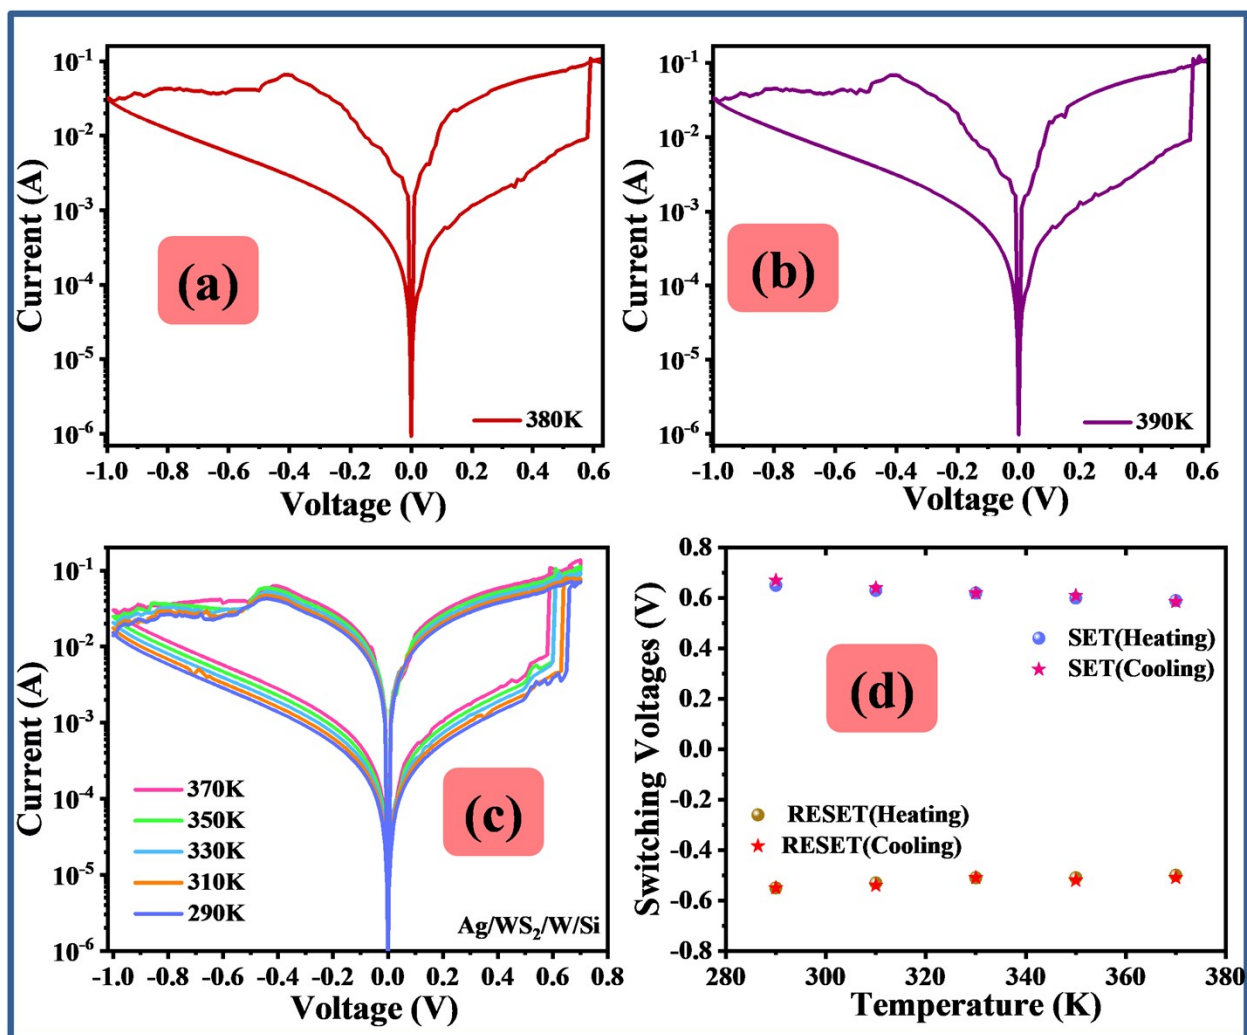

**Fig. S7.** Current-voltage curve at (a) 380K, (b) 390K. (c) Temperature-dependent IV curve while decreasing from 370K to 290K. (d) SET/RESET variation while increasing (heating) and decreasing (cooling) temperature.

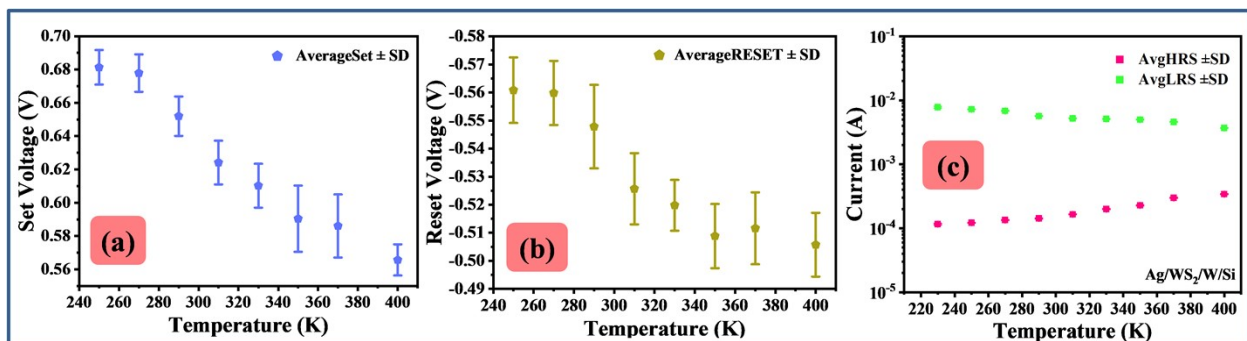

**Fig. S8.** Temperature-dependent (a, b) SET and RESET voltages, respectively, (c) HRS/LRS states, using error bar plots.

## Section S1. Calculation of barrier height

The Schottky barrier height ( $\Phi_B$ ) at the Ag/WS<sub>2</sub> interface can be determined using the Richardson Schottky-thermionic emission equation model, which describes the current flow under the influence of an electric field. The current-voltage (I-V) relationship is expressed as:

$$I = A^* T^2 \exp\left[-\frac{q(\Phi_B - \sqrt{qV}/4\pi\epsilon_r\epsilon_0 d)}{k_B T}\right] \quad (1)$$

where  $A = \pi (50 \mu\text{m})^2$  is the contact cell area, and Richardson constant,  $A^* = \frac{4\pi\epsilon q M n k^2}{h^3}$ ,  $q$  is electric charge,  $\epsilon$  is the dielectric constant of the material,  $\Phi_B$  is Schottky barrier height,  $T$  is temperature,  $d$  is the distance between the top and bottom electrodes, and  $k$  is the Boltzmann constant.

Taking the natural logarithm of Eq. (1):

$$\ln(I) = \left\{ \ln(AA^* T^2) - \frac{q}{kT} \Phi_B \right\} + \frac{q}{kT} \sqrt{\frac{E}{4\pi\epsilon}} \sqrt{V}$$

Thus, a plot of  $\ln(I)$  against  $\sqrt{V}$  yield a straight line, where the intercept provides the information about the barrier height ( $\Phi_B$ ). The intercept at  $\sqrt{V}=0$  is given by:

$$\text{Intercept} = \left\{ \ln(AA^* T^2) - \frac{q}{kT} \Phi_B \right\}$$

The term  $\ln(AA^* T^2)$  is much smaller compared to  $\frac{q}{kT} \Phi_B$ , allowing it to be neglected for barrier height estimation. Thus,  $\Phi_B$  can be approximated from the intercept as:

$$\Phi_B = - \left( \frac{kT}{q} \right) \times \text{Intercept}$$

Using this, the Schottky barrier at the Ag/WS<sub>2</sub> interface is determined as 0.38 eV.

Table S1. Comparison of prior reported WS<sub>2</sub>-based memristor devices.

| Device structure                              | Modulation method    | Synaptic behavior        | Non-linearity (LTP/D) | No. of pulses /cycle | Pulse information (Amplitude /width)                           | Endurance (LTP/LTD)   | Time constants ( $\tau_1$ , $\tau_2$ ) | Refs.            |
|-----------------------------------------------|----------------------|--------------------------|-----------------------|----------------------|----------------------------------------------------------------|-----------------------|----------------------------------------|------------------|
| Pd/WS <sub>2</sub> /Pt                        | Spin Coating         | PPF, STDP, STP to LTP    | No                    | No                   | PPF: 2V (500 ns)<br>STDP: $\pm$ 2V (500 ns)                    | No                    | N/A                                    | <sup>1</sup>     |
| TiN/BTO/WS <sub>2</sub> /TiO <sub>x</sub> /Pt | Bilayer              | LTP/D, PPF               | N/A                   | 200                  | LTP/D: 0.7 V to -0.72 V (50 $\mu$ s)                           | 50 cycles             | (0.065 ms, 0.75 ms)                    | <sup>2</sup>     |
| Ag/Zr <sub>70</sub> W <sub>30</sub> /Pt       | Hybrid nanocomposite | LTP/D, PPF/D             | (2.5, -0.12)          | 100                  | LTP/D: 0.36 to 0.44 V (-0.34 to -0.42 V)                       | 20 cycles             | (0.06 $\mu$ s, 0.186 $\mu$ s)          | <sup>3</sup>     |
| Pt/TiN/HfO <sub>2</sub> /WS <sub>2</sub> /Pt  | Bilayer              | LTP/D, PPF/D, STDP, SRDP | (1.5, 0.45)           | 100                  | LTP/D: $\pm$ 1.4 V (1 $\mu$ s), PPF/D: $\pm$ 1.2 V (2 $\mu$ s) | 6 Cycles              | N/A                                    | <sup>4</sup>     |
| <b>Ag/WS<sub>2</sub>/W</b>                    | <b>Sputtering</b>    | <b>LTP/D, PPF, D</b>     | <b>(1.24, 1.16)</b>   | <b>120</b>           | <b>LTP/D: <math>\pm</math>0.8 V (20</b>                        | <b>&gt;100 cycles</b> | <b>7.17 ms,</b>                        | <b>This Work</b> |

|  |  |  |  |  |                                    |  |               |  |
|--|--|--|--|--|------------------------------------|--|---------------|--|
|  |  |  |  |  | ms)<br>PPF/D:<br>±0.8 V (10<br>ms) |  | 130.3<br>7 ms |  |
|--|--|--|--|--|------------------------------------|--|---------------|--|

## References

- 1 X. Yan, Q. Zhao, A. P. Chen, J. Zhao, Z. Zhou, J. Wang, H. Wang, L. Zhang, X. Li, Z. Xiao, K. Wang, C. Qin, G. Wang, Y. Pei, H. Li, D. Ren, J. Chen and Q. Liu, *Small*, DOI:10.1002/sml.201901423.
- 2 M. Ismail, H. Na, Y. Lee, M. Rasheed, C. Mahata, J. K. Lee and S. Kim, *Small*, DOI:10.1002/sml.202508508.
- 3 F. Ghafoor, H. Kim, B. Ghafoor, M. A. Hamayun, M. F. Maqsood, M. J. Lee and D. kee Kim, *Appl. Mater. Today*, DOI:10.1016/j.apmt.2025.102959.
- 4 M. Ismail, M. Rasheed, S. Kim, C. Mahata, M. Kang and S. Kim, *ACS Mater. Lett.*, 2023, **5**, 3080–3092.
